# Supplementary material for: Microstructure, grain and nanowire growth during selective laser melting of Ag–Cu/diamond composites
Source: Royal Society of Chemistry journal article supplement (doi:10.1039/d2ra05965g), 2023-01-01
Supplement: d2ra05965g1.pdf [file d2ra05965g1.pdf]

## Supporting Information

### Microstructures, Grain and Nanowires Growth during Selective Laser Melting of Ag-Cu/Diamond Composites

Chenxing Xin<sup>1,2</sup>, Xiya Zhao<sup>1,2</sup>, Haoze Geng<sup>1,2</sup>, Ping Gong<sup>1,2</sup>, Liang Hao<sup>1,2</sup>, Yan Li<sup>1,2,\*</sup>

<sup>a</sup> Gemmological Institute, China of Geosciences, 430074, P. R. China.

<sup>b</sup> Advanced Manufacturing Centre, China University of Geosciences, Wuhan, 430074, P. R. China.

Corresponding authors: [yanli@cug.edu.cn](mailto:yanli@cug.edu.cn);

### Content

**Figure S1:** The morphology of diamond particles.

**Table S1:** The detailed parameters of rectangular contour samples.

**Eq S1:** The line energy density (LED, J/m)

**Figure S2:** LED at different processing parameters of rectangle contours.

**Table S2:** The processing parameters used to manufacture cubic samples.

**Figure S3:** Thermophysical properties of Ag-Cu powders.

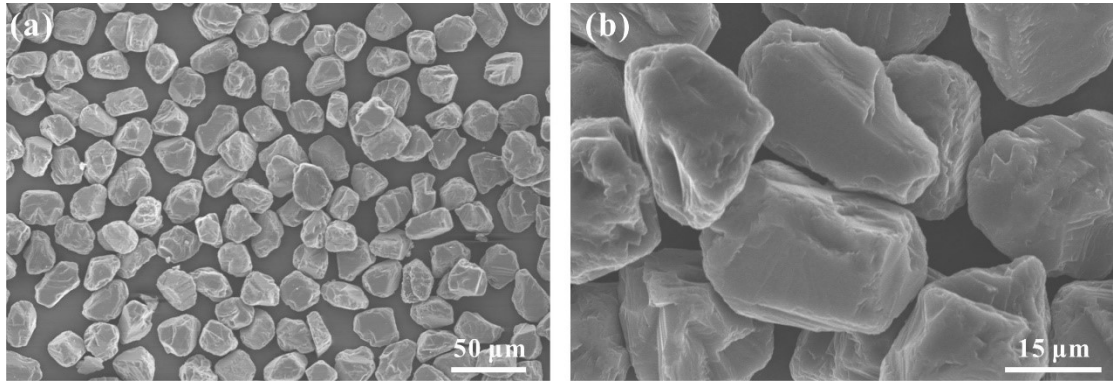

**Figure S1.** The morphology of diamond particles.

**Table S1:** The detailed parameters of rectangular contour samples.

| Process parameters                   | Rectangular contour samples                       |
|--------------------------------------|---------------------------------------------------|
| Laser power (W)                      | 40, 50, 60, 70, 80, 90, 100, 110, 120             |
| Scanning speed (mm/s)                | 400, 600, 800, 1000, 1200, 1400, 1600, 1800, 2000 |
| Layer thickness ( $\mu\text{m}$ )    | 100                                               |
| Speciment geometry ( $\text{mm}^2$ ) | $1 \times 5$                                      |

The line energy density (LED, J/m) is defined as **Eq S1**:

$$LED = \frac{P}{v} \quad (1)$$

where  $P$  represents the laser power (W) and  $v$  is the scanning speed (mm/s), respectively.

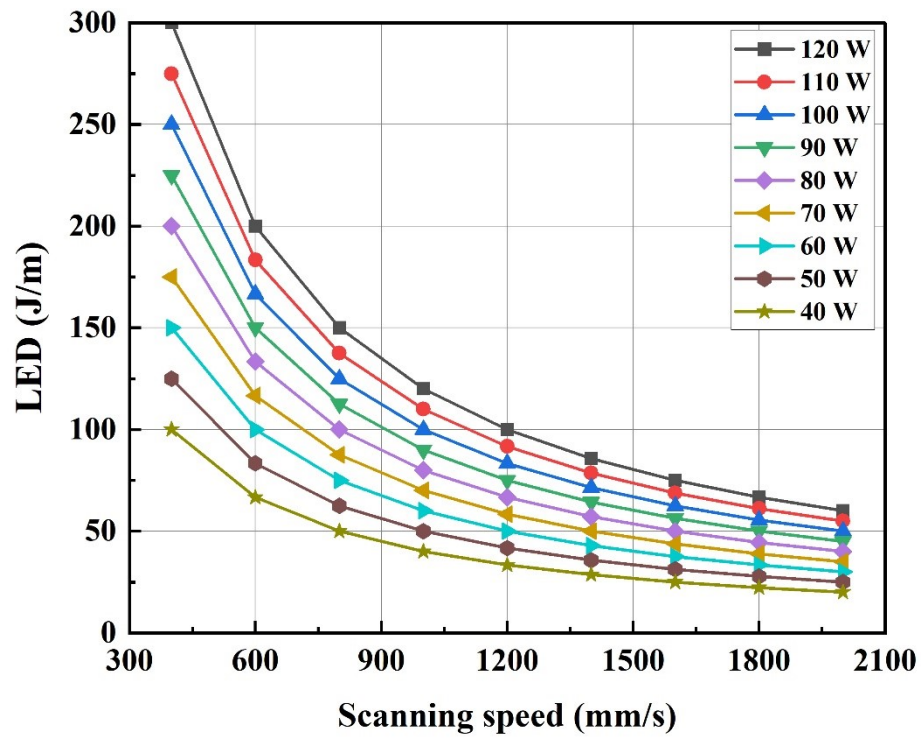

Figure S2: LED at different processing parameters of rectangle contours.

**Table S2:** The processing parameters used to manufacture cubic samples.

| Types        | Input volume<br>energy density<br>(J/mm <sup>3</sup> ) | Processing parameter<br>$P$ (W), $v$ (mm/s), $h$ (mm), $t$ (mm) |
|--------------|--------------------------------------------------------|-----------------------------------------------------------------|
| Over melting | 562.5                                                  | $P = 90, v = 800, h = 0.01, t = 0.02$                           |
|              | 625                                                    | $P = 100, v = 800, h = 0.01, t = 0.02$                          |
|              | 500                                                    | $P = 100, v = 1000, h = 0.01, t = 0.02$                         |
|              | 600                                                    | $P = 120, v = 1000, h = 0.01, t = 0.02$                         |
|              | 300                                                    | $P = 60, v = 1000, h = 0.01, t = 0.02$                          |
| Good melting | 450                                                    | $P = 90, v = 1000, h = 0.01, t = 0.02$                          |
|              | 357.1                                                  | $P = 100, v = 1400, h = 0.01, t = 0.02$                         |
|              | 428.6                                                  | $P = 120, v = 1400, h = 0.01, t = 0.02$                         |
| Weak melting | 200                                                    | $P = 40, v = 1000, h = 0.01, t = 0.02$                          |
|              | 166.7                                                  | $P = 40, v = 1200, h = 0.01, t = 0.02$                          |
|              | 250                                                    | $P = 60, v = 1200, h = 0.01, t = 0.02$                          |
|              | 214.3                                                  | $P = 60, v = 1400, h = 0.01, t = 0.02$                          |

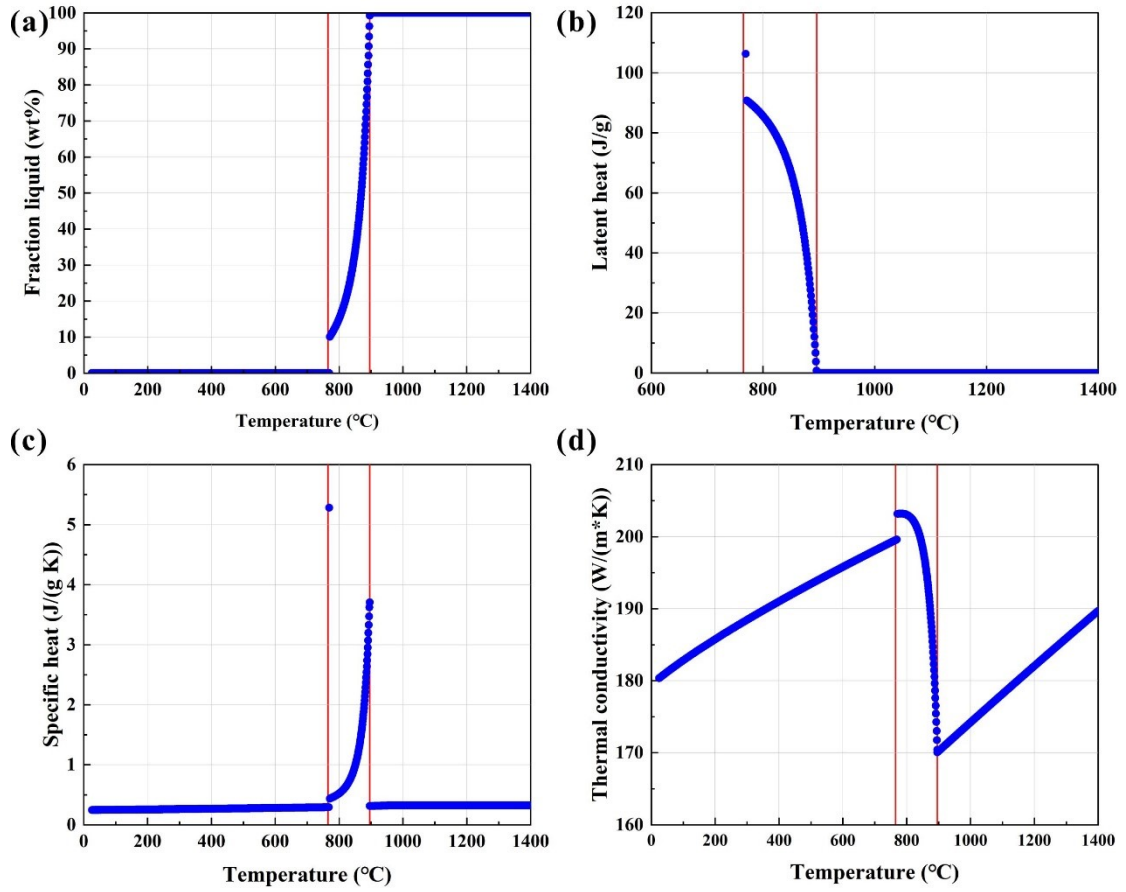

**Figure S3:** Thermophysical properties of Ag-Cu powders. (a) solidification curve; (b) latent heat curve; (c) specific heat curve; and (d) thermal conductivity curve.
